# Supplementary material for: Crystal reconstruction and defect healing enabled high-quality Sb2Se3 films for solar cell applications
Source: Royal Society of Chemistry journal article supplement (doi:10.1039/d4ta00734d), 2024-01-01
Supplement: d4ta00734d1.pdf [file d4ta00734d1.pdf]

## Electronic Supplementary Information (ESI)

### Crystal Reconstruction and Defects Healing Enabled High-quality Sb<sub>2</sub>Se<sub>3</sub> Films for Solar Cell Applications

Qi Zhao,<sup>a</sup> Bo Che,<sup>a</sup> Haolin Wang,<sup>a</sup> Xiaoqi Peng,<sup>a</sup> Junjie Yang,<sup>a</sup> Rongfeng Tang,<sup>a</sup> Changfei Zhu,<sup>a</sup> and Tao Chen<sup>\*a</sup>

- a. Hefei National Research Center for Physical Sciences at the Microscale, CAS Key Laboratory of Materials for Energy Conversion, Department of Materials Science and Engineering, School of Chemistry and Materials Science, University of Science and Technology of China, Hefei, 230026, China.

\*Corresponding authors: Tao Chen

E-mail: [tchenmse@ustc.edu.cn](mailto:tchenmse@ustc.edu.cn)

#### **This file includes:**

Supplementary note S1

Figure S1 to S6

Table S1 to S7

References

## Supplementary Note

### Note 1

#### Principles of Deep-level Transient Spectroscopy

We conducted deep-level transient spectroscopy (DLTS) to detect the deep-level defects properties and the defect level is identified from DLTS signal using Fourier deconvolution algorithm. The active energy ( $E_a$ ,  $E_C - E_T$  or  $E_T - E_V$ ) and capture cross section of electron traps and hole traps can be calculated by the Arrhenius Equations (1) and (2),

$$\ln(\tau_e \nu_{th,p} N_V) = \frac{E_T - E_V}{k_B} \frac{1}{T} - \ln(X_p \sigma_p) \#(1)$$

$$\ln(\tau_e \nu_{th,n} N_C) = \frac{E_C - E_T}{k_B} \frac{1}{T} - \ln(X_n \sigma_n) \#(2)$$

where  $\tau_e$ ,  $N_V$ ,  $N_C$ ,  $E_T$ ,  $E_V$ , and  $E_C$  are emission time constant, valence band state density, conduction band state density, trap energy level, valence band, and conduction band, respectively.  $\nu_{th,n/p}$ ,  $X_{n/p}$ , and  $\sigma_{n/p}$  are thermal velocity, entropy factor, and capture cross-section for electron and hole, respectively.  $E_a$  can be obtained from the slope of the corresponding line, and the  $\sigma$  can be obtained from the y-intercept of the lines. The trap concentration ( $N_T$ ) can be acquired from Equation (3):

$$N_T = 2N_S \frac{\Delta C}{C_R} \#(3)$$

where  $N_S$  is the shallow donor concentration,  $C_R$  is the capacitance under reverse bias, while  $\Delta C$  represents the amplitude of transient capacitance.

The product of the capture cross section and the defect density ( $\sigma \times N_T$ ) is considered as an important parameter for the intuitive evaluation of the carrier lifetime, and the relationship follows the following Equation (4):

$$\tau_{trap} = \frac{1}{v\sigma N_T} \#(4)$$

where  $v$  is the thermal velocity of electric charge.<sup>1,2</sup>

### Supplementary Figure

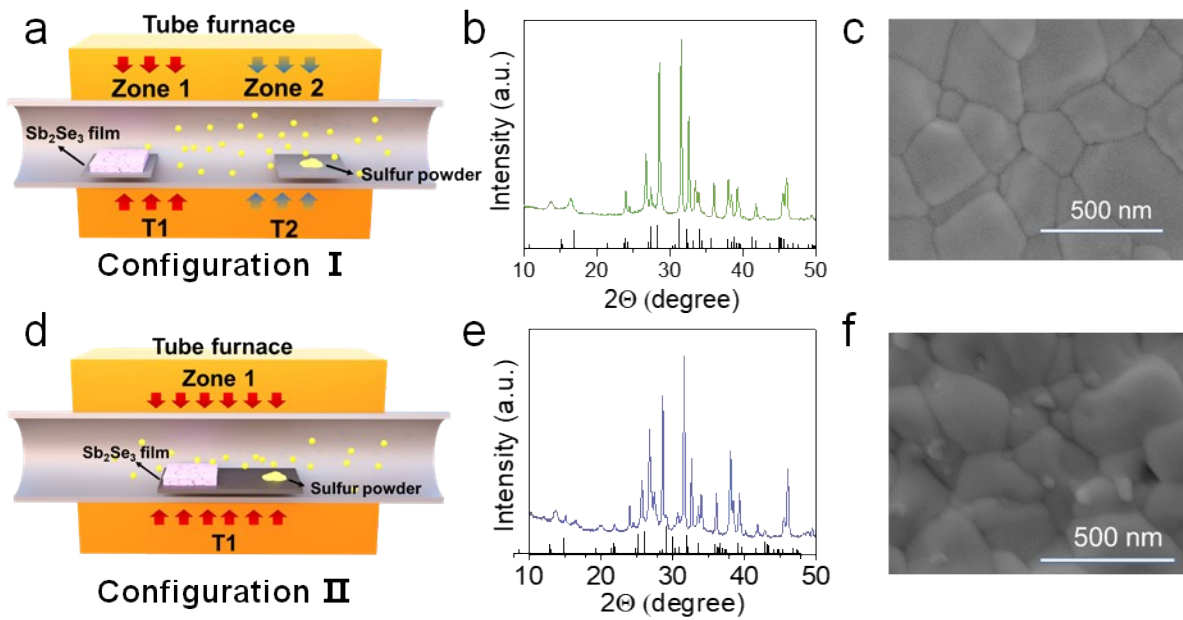

**Fig. S1. Characterization of structure and surface morphology of the films.** XRD pattern of the  $\text{Sb}_2\text{Se}_3$  films sulfurized using b) configuration I and e) configuration II; Surface SEM images of the  $\text{Sb}_2\text{Se}_3$  films sulfurized using b) configuration I and e) configuration II.

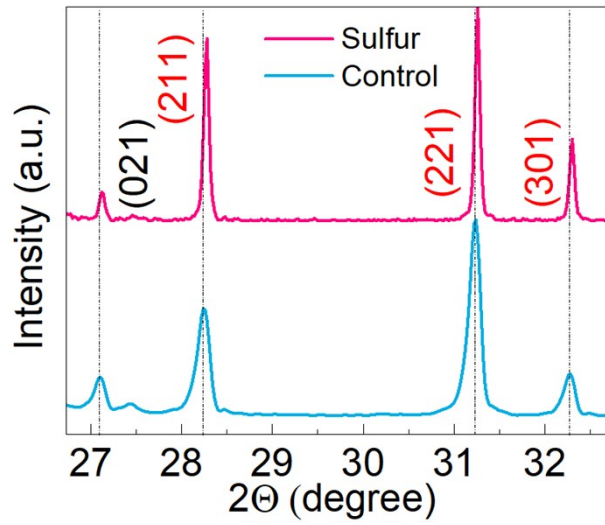

**Fig. S2. Magnified view of the (021), (211),(221) and (301) XRD peaks of the films.**

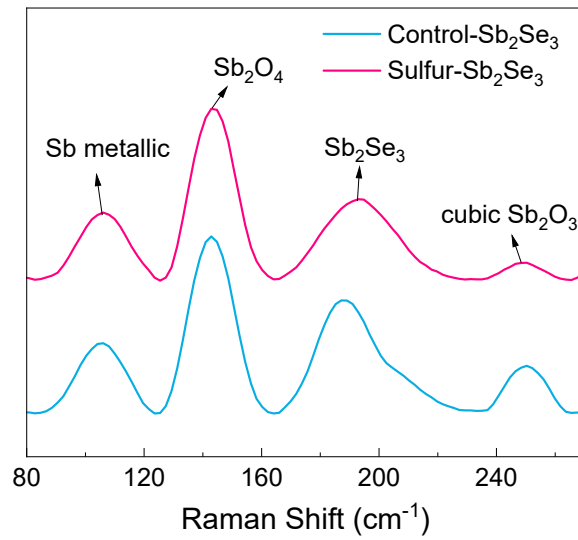

**Fig. S3. Raman spectra of the Control-Sb<sub>2</sub>Se<sub>3</sub> and Sulfur-Sb<sub>2</sub>Se<sub>3</sub> films.**

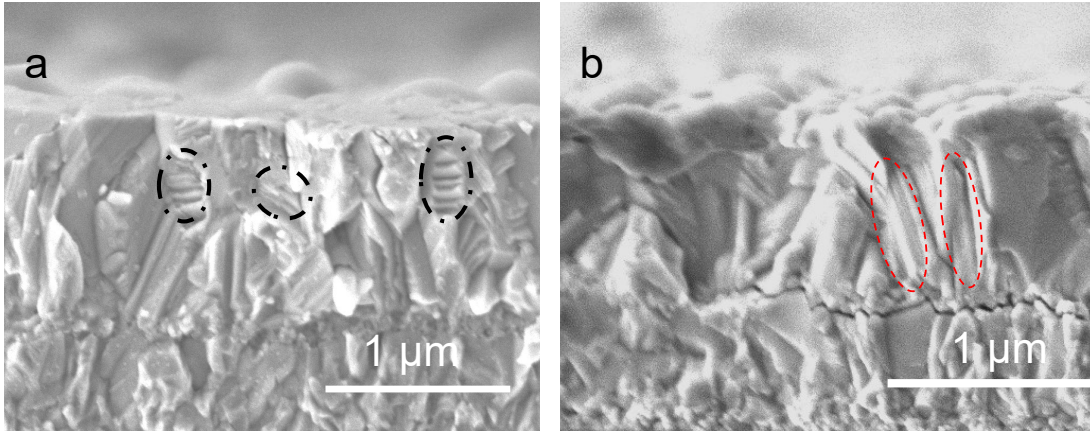

**Fig. S4.** The cross-sectional SEM image of the films. a) Control-Sb<sub>2</sub>Se<sub>3</sub> films, b) Sulfur-Sb<sub>2</sub>Se<sub>3</sub> films.

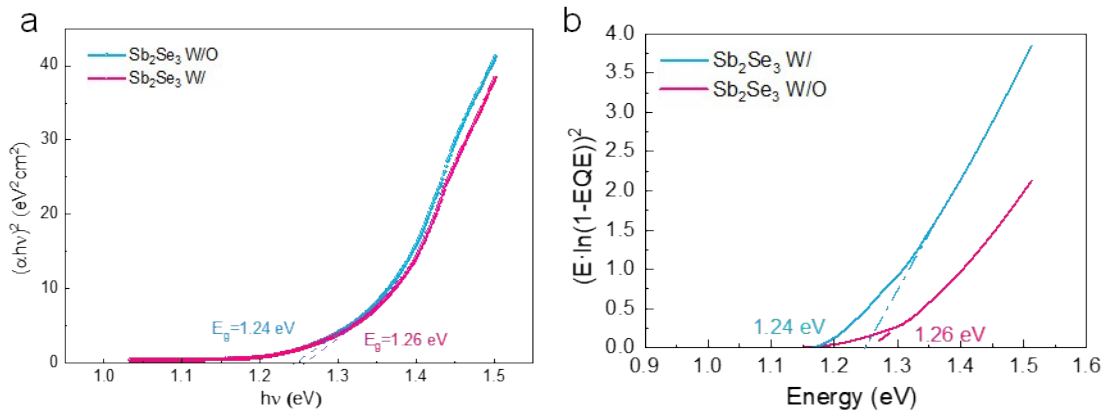

**Fig. S5.** UV-visible absorption characterization of the films. a) plot of  $(\alpha h\nu)^2$  versus  $(h\nu)$  of Sb<sub>2</sub>Se<sub>3</sub> films. b) Bandgap value extracted from EQE spectra.

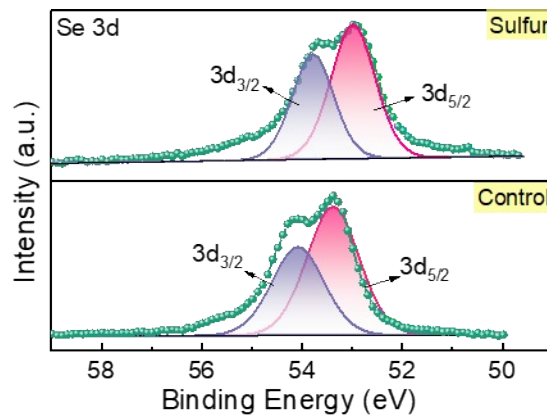

**Fig. S6. Surface composition of the films.** Analysis of the surface chemical states of Control-Sb<sub>2</sub>Se<sub>3</sub> and Sulfur-Sb<sub>2</sub>Se<sub>3</sub> films for Se 3d XPS peaks.

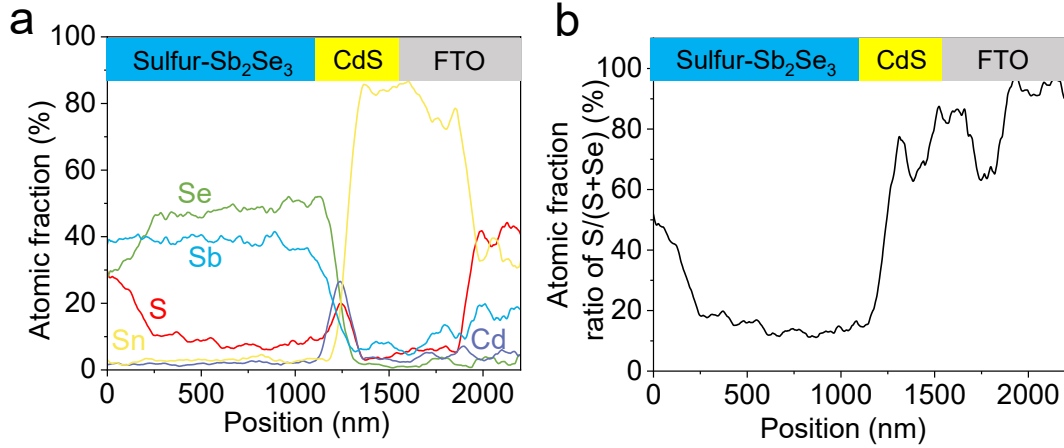

**Fig. S7. Elementary composition of the films.** a) EDX line scan of Sulfur-Sb<sub>2</sub>Se<sub>3</sub>; b) Atomic fraction ratio of S/(S+Se) in Sb<sub>2</sub>Se<sub>3</sub> films.

**Table S1 Effect of annealing temperature on device performance**

| Temperature/<br>°C | $V_{OC}/V$ | $J_{SC}/mA\ cm^{-2}$ | FF/%  | PCE/% |
|--------------------|------------|----------------------|-------|-------|
| 370                | 0.43       | 28.21                | 52.75 | 6.45  |
| 360                | 0.43       | 27.56                | 53.81 | 6.43  |
| 350                | 0.43       | 27.21                | 55.36 | 6.50  |

**Table S2 Effect of annealing time on device performance**

| Time/min | $V_{OC}/V$ | $J_{SC}/mA\ cm^{-2}$ | FF/% | PCE/% |
|----------|------------|----------------------|------|-------|
|----------|------------|----------------------|------|-------|

|           |      |       |       |      |
|-----------|------|-------|-------|------|
| <b>10</b> | 0.43 | 27.12 | 55.36 | 6.50 |
| <b>20</b> | 0.46 | 29.70 | 48.98 | 6.66 |
| <b>30</b> | 0.41 | 29.57 | 38.05 | 4.60 |

**Table S3 Effect of the amount of sulfur on device performance**

| <b>Amount/g</b> | $V_{OC}/V$ | $J_{SC}/mA\ cm^{-2}$ | <b>FF/%</b> | <b>PCE/%</b> |
|-----------------|------------|----------------------|-------------|--------------|
| <b>0.025</b>    | 0.41       | 29.95                | 54.75       | 6.71         |
| <b>0.05</b>     | 0.40       | 31.31                | 53.16       | 6.71         |
| <b>0.1</b>      | 0.45       | 30.06                | 56.23       | 7.63         |
| <b>0.2</b>      | 0.44       | 31.15                | 54.99       | 7.53         |
| <b>0.3</b>      | 0.42       | 31.48                | 53.68       | 7.12         |
| <b>0.4</b>      | 0.40       | 30.15                | 53.76       | 6.43         |

**Table S4 Effect of the thickness on device performance**

| <b>Thickness/nm</b> | $V_{OC}/V$ | $J_{SC}/mA\ cm^{-2}$ | <b>FF/%</b> | <b>PCE/%</b> |
|---------------------|------------|----------------------|-------------|--------------|
| <b>400</b>          | 0.42       | 28.81                | 52.55       | 6.38         |
| <b>1000</b>         | 0.45       | 30.06                | 56.23       | 7.63         |
| <b>1200</b>         | 0.40       | 31.47                | 56.41       | 7.05         |
| <b>1500</b>         | 0.42       | 29.75                | 57.63       | 7.12         |

**Table S5 Effect of the temperature of sulfur on device performance**

| Temperature/<br>°C | $V_{OC}/V$ | $J_{SC}/mA\ cm^{-2}$ | FF/%  | PCE/% |
|--------------------|------------|----------------------|-------|-------|
| 250                | 0.45       | 30.06                | 56.23 | 7.63  |
| 275                | 0.40       | 32.19                | 54.02 | 6.90  |
| 300                | 0.38       | 30.60                | 56.88 | 6.59  |

**Table S6 The element proportion of Sulfur-Sb<sub>2</sub>Se<sub>3</sub> and Control-Sb<sub>2</sub>Se<sub>3</sub>**

| Sb <sub>2</sub> Se <sub>3</sub> films   | Se (at.%) | S (at.%) | Sb (at.%) | (Se+S)/Sb | S/(Se+S) |
|-----------------------------------------|-----------|----------|-----------|-----------|----------|
| Sulfur-Sb <sub>2</sub> Se <sub>3</sub>  | 33.0      | 8.6      | 21.5      | 1.93      | 0.21     |
| Control-Sb <sub>2</sub> Se <sub>3</sub> | 47.5      | 0        | 26.3      | 1.81      | 0        |

**Table S7 Parameters fitted from electrochemical impedance spectra of devices**

| Sample                                  | $R_S(\Omega)$ | $R_{REC}(\Omega)$ |
|-----------------------------------------|---------------|-------------------|
| Control-Sb <sub>2</sub> Se <sub>3</sub> | 54.2          | 15411             |
| Sulfur-Sb <sub>2</sub> Se <sub>3</sub>  | 77.74         | 3046              |

**References**

1. Y. Zhao, S. Wang, C. Li, B. Che, X. Chen, H. Chen, R. Tang, X. Wang, G. Chen, T. Wang, J. Gong, T. Chen, X. Xiao and J. Li, *Energy & Environmental Science*, 2022, **15**, 5118-5128.
2. S. Wang, Y. Zhao, B. Che, C. Li, X. Chen, R. Tang, J. Gong, X. Wang, G. Chen, T. Chen,



J. Li and X. Xiao, *Adv Mater*, 2022, **34**, e2206242.
